# Supplementary material for: Effects of Magnesium Oxide and Magnesium Hydroxide Microparticle Foliar Treatment on Tomato PR Gene Expression and Leaf Microbiome
Source: MDPI journal article supplement (doi:10.3390/microorganisms9061217), 2021-06-04
Supplement: s1 [file s1]

# Supplementary Information Document

## Effects of magnesium oxide and magnesium hydroxide microparticle foliar treatment on tomato PR gene expression and leaf microbiome.

Aggeliki Andreadelli <sup>1</sup>, Spyros Petrakis <sup>1</sup>, Antiopi Tsourekis <sup>1</sup>, George Tsiolas <sup>1</sup>, Sofia Michailidou <sup>1</sup>, Penelope Baltzopoulou <sup>2</sup>, Robert van Merkestein<sup>3</sup>, Philip Hodgson<sup>3</sup>, Mark Sceats<sup>3</sup>, George Karagiannakis <sup>2</sup> and Antonios M. Makris <sup>1,\*</sup>

May 2021

\*corresponding author: makris@certh.gr; Tel.: +30-2311-257-541

The file includes:

Table S1: Primer sequences for NGS libraries

Table S2: Primer sequences for qPCR 5'-3'

Figure S1: Energy-dispersive X-ray spectroscopy of sprayed tomato leaves

### Primer sequences

**Table S1. Primer sequences for NGS libraries**

|       |                                                               |
|-------|---------------------------------------------------------------|
| 16S_F | 5'-TCGTCGGCAGCGTCAGATGTGTATAAGAGACAGCCTACGGGNGGCWGCAG-3'      |
| 16S_R | 5'-GTCTCGTGGGCTCGGAGATGTGTATAAGAGACAGGACTACHVGGGTATCTAATCC-3' |
| 18S_F | 5'-TCGTCGGCAGCGTCAGATGTGTATAAGAGACAGCGATAACGAACGAGACCT-3'     |
| 18S_R | 5'-GTCTCGTGGGCTCGGAGATGTGTATAAGAGACAGANCCATTCAATCGGTANT-3'    |

**Table S2. Primer sequences for RT-qPCR 5'-3'**

|                                           |                             | RT-qPCR product | Accession | Source reference |
|-------------------------------------------|-----------------------------|-----------------|-----------|------------------|
| beta-1,3-glucanase (PR2)                  |                             |                 |           |                  |
| Forward                                   | 5'-GGACACCCTTCCGCTACTCTT-3' | 81bp            | M80604    | [1]              |
| Reverse                                   | 5'-TGTCCTGCCCCCTCCTTTC-3'   |                 |           |                  |
| glucan endo-1,3-beta-glucosidase B (PR2B) |                             |                 |           |                  |
| Forward                                   | 5'-CCCATTTCAGTTCTGCTT-3'    | 112bp           | M80608.1  | [2]              |
| Reverse                                   | 5'-AGAATTGCCAATCAACGTCA-3'  |                 |           |                  |
| CHI9 chitinase (PR3)                      |                             |                 |           |                  |
| Forward                                   | 5'-AACTATGGGCCATGTGGAAGA-3' | 128bp           | Z15140    | [1]              |
| Reverse                                   | 5'-GGCTTTGGGGATTGAGGAG3'    |                 |           |                  |
| CHI3 chitinase                            |                             |                 |           |                  |

|                                     |                                 |       |              |     |
|-------------------------------------|---------------------------------|-------|--------------|-----|
| Forward                             | 5'-GGTTCTGGATGACAGAACAGGA-3'    | 107bp | Z15141       | [3] |
| Reverse                             | 5'-GTACCCTGGAAGCTCTATTAGCTGC-3' |       |              |     |
| Phenylalanine ammonia-lyase (PAL-4) |                                 |       |              |     |
| Forward                             | 5'-ACGGGTTGCCATCTAATCTG-3'      | 197bp | TIGRTC153699 | [4] |
| Reverse                             | 5'-AGCTCTTTTCCTGGCTGAAA-3'      |       |              |     |
| Elongation factor 1 alpha (EF1a)    |                                 |       |              |     |
| Forward                             | 5'-CTCCAAGGCTAGGTATGATGA-3'     | 263bp | X14449.1     | [5] |
| Reverse                             | 5'-ACAGTTCCAATACCACCAATCT-3'    |       |              |     |

## Energy-dispersive X-ray spectroscopy of sprayed tomato leaves

The Scanning Electron Microscopy (SEM) analysis of sprayed leaves, shown in the images of Figure 7 of the manuscript, was complimented by Energy dispersive X-Ray Spectroscopy (EDS) to verify the presence of magnesium (Mg) on the leaves surface. Representative images of EDS spectra from both Day 5 and Day 12 are provided in Figure S1 below. The main observations relate to the clear presence of Mg on the leaves sprayed with the 3 PMP slurries. The control sample (sprayed with distilled water) shows only a small background peak, while the intensity of the Mg peak is clearly higher in Day 5 as compared to Day 12, thereby confirming that the material was gradually removed from the leaves surface with time.

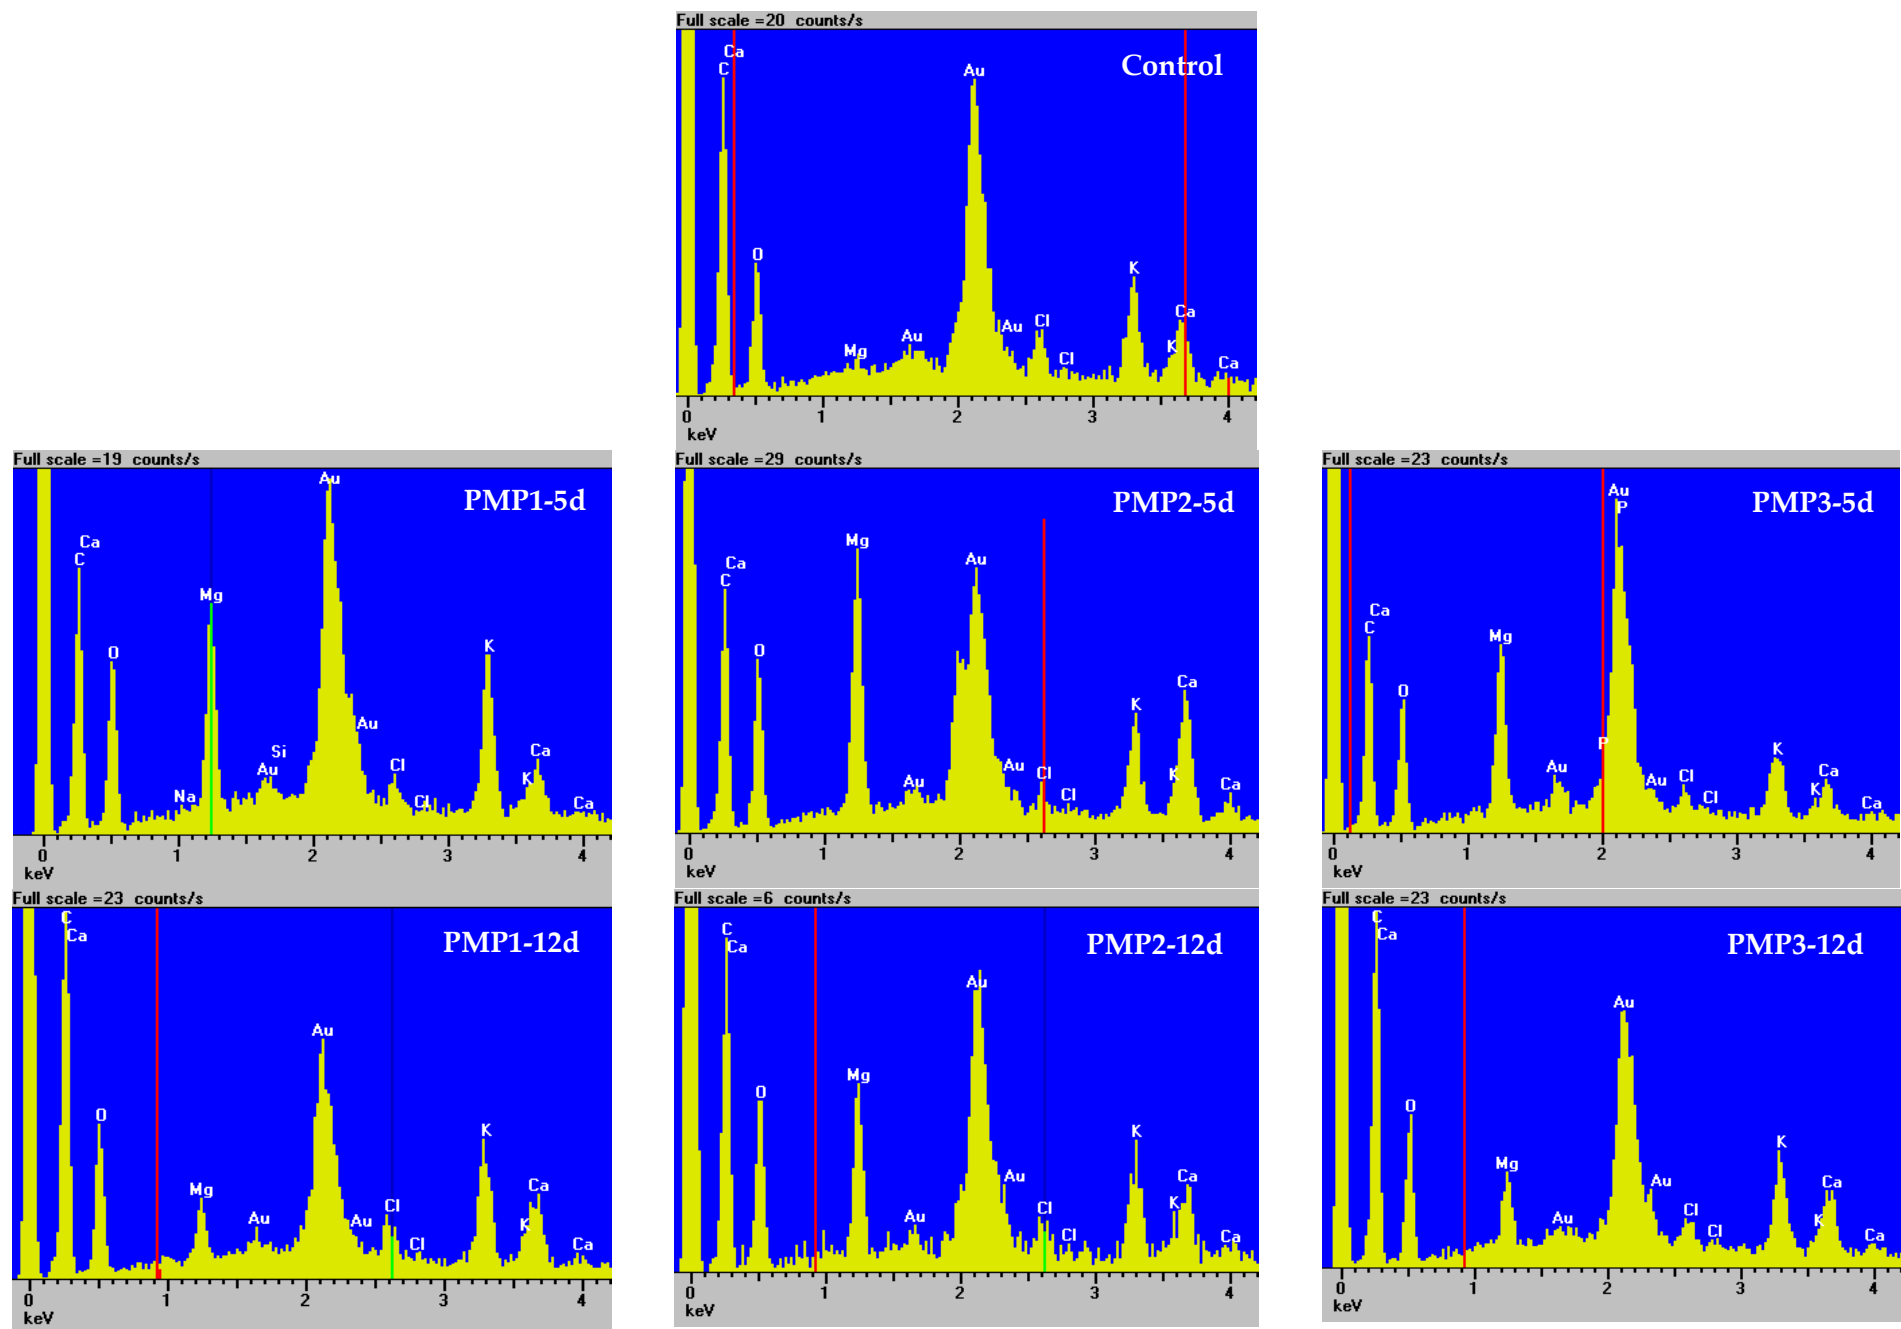

**Figure S1** Images from Energy Dispersive X-Ray Spectroscopy carried out during SEM analysis of sprayed tomato leaves shown in Figure 6 of the manuscript.

1. Song, Y.; Chen, D.; Lu, K.; Sun, Z.; Zeng, R. Enhanced tomato disease resistance primed by arbuscular mycorrhizal fungus. *Frontiers in Plant Science* **2015**, *6*, doi:10.3389/fpls.2015.00786.
2. Tan, X.L.; Chen, J.L.; Benelli, G.; Desneux, N.; Yang, X.Q.; Liu, T.X.; Ge, F. Pre-infestation of Tomato Plants by Aphids Modulates Transmission-Acquisition Relationship among Whiteflies, Tomato Yellow Leaf Curl Virus (TYLCV) and Plants. *Frontiers in Plant Science* **2017**, *8*, doi:10.3389/fpls.2017.01597.
3. Balaji, V.; Mayrose, M.; Sherf, O.; Jacob-Hirsch, J.; Eichenlaub, R.; Iraki, N.; Manulis-Sasson, S.; Rechavi, G.; Barash, I.; Sessa, G. Tomato Transcriptional Changes in Response to *Clavibacter michiganensis* subsp. *michiganensis* Reveal a Role for Ethylene in Disease Development. *Plant Physiology* **2008**, *146*, 1797-1809, doi:10.1104/pp.107.115188.
4. Aimé, S.; Alabouvette, C.; Steinberg, C.; Olivain, C. The Endophytic Strain *Fusarium oxysporum* Fo47: A Good Candidate for Priming the Defense Responses in Tomato Roots. *Molecular Plant-Microbe Interactions*® **2013**, *26*, 918-926, doi:10.1094/mpmi-12-12-0290-r.
5. Tsaballa, A.; Nikolaidis, A.; Trikka, F.; Ignea, C.; Kampranis, S.C.; Makris, A.M.; Argiriou, A. Use of the de novo transcriptome analysis of silver-leaf nightshade (*Solanum elaeagnifolium*) to identify gene expression changes associated with wounding and terpene biosynthesis. *BMC Genomics* **2015**, *16*, 504, doi:10.1186/s12864-015-1738-3.
